# Supplementary material
Source: bioRxiv or medRxiv preprint supplement (https://www.biorxiv.org/highwire/filestream/58977/field_highwire_adjunct_files/5/038141-6.pdf)
Supplement: Supplementary file [file 038141-6.pdf]

**Table S5.** Environmental variable values for each individual mouse. Impervious = mean % impervious surface in 2 km buffer. Density = human population per 2 km buffer. Urban or Rural = classification as urban or rural site.

| <b>Individual</b>          | <b>Impervious</b> | <b>Density</b> | <b>Urban or Rural</b> |
|----------------------------|-------------------|----------------|-----------------------|
| BROOKHAVEN.01              | 3.507372942       | 2080.024302    | Rural                 |
| BROOKHAVEN.02              | 3.507372942       | 2080.024302    | Rural                 |
| BROOKHAVEN.03              | 3.507372942       | 2080.024302    | Rural                 |
| CLARENCE FAHNSTOCK PARK.01 | 0.108890322       | 56.03608869    | Rural                 |
| CLARENCE FAHNSTOCK PARK.02 | 0.108890322       | 56.03608869    | Rural                 |
| CLARENCE FAHNSTOCK PARK.03 | 0.108890322       | 56.03608869    | Rural                 |
| CLARENCE FAHNSTOCK PARK.04 | 0.108890322       | 56.03608869    | Rural                 |
| CLARENCE FAHNSTOCK PARK.05 | 0.108890322       | 56.03608869    | Rural                 |
| CLARENCE FAHNSTOCK PARK.06 | 0.108890322       | 56.03608869    | Rural                 |
| CLARENCE FAHNSTOCK PARK.07 | 0.108890322       | 56.03608869    | Rural                 |
| CLARENCE FAHNSTOCK PARK.09 | 0.108890322       | 56.03608869    | Rural                 |
| CENTRAL PARK.04            | 60.23674405       | 351698.7835    | Urban                 |
| CENTRAL PARK.07            | 60.23674405       | 351698.7835    | Urban                 |
| CENTRAL PARK.10            | 60.23674405       | 351698.7835    | Urban                 |
| CENTRAL PARK.12            | 60.23674405       | 351698.7835    | Urban                 |
| CENTRAL PARK.14            | 60.23674405       | 351698.7835    | Urban                 |
| CENTRAL PARK.19            | 60.23674405       | 351698.7835    | Urban                 |
| CENTRAL PARK.22            | 60.23674405       | 351698.7835    | Urban                 |
| CENTRAL PARK.23            | 60.23674405       | 351698.7835    | Urban                 |
| FLUSHING MEADOW.01         | 57.97034809       | 125893.0675    | Urban                 |
| FLUSHING MEADOW.04         | 57.97034809       | 125893.0675    | Urban                 |
| FLUSHING MEADOW.08         | 57.97034809       | 125893.0675    | Urban                 |
| FLUSHING MEADOW.11         | 57.97034809       | 125893.0675    | Urban                 |
| FLUSHING MEADOW.14         | 57.97034809       | 125893.0675    | Urban                 |
| FLUSHING MEADOW.15         | 57.97034809       | 125893.0675    | Urban                 |
| FLUSHING MEADOW.16         | 57.97034809       | 125893.0675    | Urban                 |
| FLUSHING MEADOW.18         | 57.97034809       | 125893.0675    | Urban                 |
| HIGH POINT PARK.01         | 0.36159851        | 157.5334921    | Rural                 |
| HIGH POINT PARK.02         | 0.36159851        | 157.5334921    | Rural                 |
| HIGH POINT PARK.03         | 0.36159851        | 157.5334921    | Rural                 |
| HIGH POINT PARK.04         | 0.36159851        | 157.5334921    | Rural                 |
| HIGH POINT PARK.11         | 0.36159851        | 157.5334921    | Rural                 |
| HIGH POINT PARK.14         | 0.36159851        | 157.5334921    | Rural                 |
| HIGH POINT PARK.19         | 0.36159851        | 157.5334921    | Rural                 |
| HIGH POINT PARK.22         | 0.36159851        | 157.5334921    | Rural                 |

|                               |             |             |       |
|-------------------------------|-------------|-------------|-------|
| NEW_YORK_BOTANICAL_GARDEN.01  | 60.88084432 | 256359.0863 | Urban |
| NEW_YORK_BOTANICAL_GARDEN.02  | 60.88084432 | 256359.0863 | Urban |
| NEW_YORK_BOTANICAL_GARDEN.14a | 60.88084432 | 256359.0863 | Urban |
| NEW_YORK_BOTANICAL_GARDEN.16  | 60.88084432 | 256359.0863 | Urban |
| NEW_YORK_BOTANICAL_GARDEN.18  | 60.88084432 | 256359.0863 | Urban |
| NEW_YORK_BOTANICAL_GARDEN.20  | 60.88084432 | 256359.0863 | Urban |
| NEW_YORK_BOTANICAL_GARDEN.23  | 60.88084432 | 256359.0863 | Urban |
| NEW_YORK_BOTANICAL_GARDEN.25  | 60.88084432 | 256359.0863 | Urban |
| WILDWOOD_PARK.01              | 3.507372942 | 2080.024302 | Rural |
| WILDWOOD_PARK.02              | 3.507372942 | 2080.024302 | Rural |
| WILDWOOD_PARK.04              | 3.507372942 | 2080.024302 | Rural |
| WILDWOOD_PARK.06              | 3.507372942 | 2080.024302 | Rural |
| WILDWOOD_PARK.07              | 3.507372942 | 2080.024302 | Rural |
